# Supplementary material
Source: PubMed Central journal article supplement (PMC8214670)
Supplement: pnas.2025051118.sapp.pdf [file pnas.2025051118.sapp.pdf]

SI Appendix for:

**Eusociality in snapping shrimps is associated with larger genomes and an accumulation of transposable elements**

Solomon T. C. Chak, Stephen E. Harris, Kristin M. Hultgren, Nicholas W. Jeffery and Dustin R. Rubenstein

Corresponding author: Solomon T. C. Chak, [chakt@oldwestbury.edu](mailto:chakt@oldwestbury.edu)

**This PDF file includes:**

Tables S1 to S4

Figures S1 to S4

**Source data files:**

Dataset S1: Proportions of TE subclass by species

Dataset S2: Total TE proportions by species

**Table S1. *Synalpheus* shrimp samples used for ddRAD sequencing to estimate the proportions of transposable elements.**

| <i>Synalpheus</i> | Sample                                  | Collection site | Quality-filtered reads | SRA     |
|-------------------|-----------------------------------------|-----------------|------------------------|---------|
| <i>agelas</i>     | JAM2008-014-002_ <i>agelas</i>          | Jamaica         | SAMN14351547           | 1712682 |
| <i>agelas</i>     | JAM2008-020-001_ <i>agelas</i>          | Jamaica         | SAMN14351548           | 76558   |
| <i>agelas</i>     | JAM2008-020-003_ <i>agelas</i>          | Jamaica         | SAMN14351549           | 156416  |
| <i>agelas</i>     | JAM2008-030-001_ <i>agelas</i>          | Jamaica         | SAMN14351550           | 4675129 |
| <i>agelas</i>     | JAM2008-044-001_ <i>agelas</i>          | Jamaica         | SAMN14351551           | 2882957 |
| <i>agelas</i>     | JAM2008-056-001_ <i>agelas</i>          | Jamaica         | SAMN14351552           | 6200200 |
| <i>agelas</i>     | JAM2008-061-006_ <i>agelas</i>          | Jamaica         | SAMN14351553           | 257228  |
| <i>agelas</i>     | JAM2008-085-003_ <i>agelas</i>          | Jamaica         | SAMN14351554           | 567308  |
| <i>androsi</i>    | BR2008-014-002_ <i>androsi</i>          | Barbados        | SAMN15732556           | 1327    |
| <i>androsi</i>    | BR2008-067-007_ <i>androsi</i>          | Barbados        | SAMN15732557           | 944758  |
| <i>androsi</i>    | BR2008-068-002-sub02_ <i>androsi</i>    | Barbados        | SAMN15732558           | 85152   |
| <i>androsi</i>    | BR2008-071-001-sub02_ <i>androsi</i>    | Barbados        | SAMN15732559           | 180989  |
| <i>ankeri</i>     | CBC2001-055-004_ CBC-<br>paraneptunus-4 | Belize          | SAMN15732560           | 1849043 |
| <i>ankeri</i>     | CBC2003-003-001_ CBC-<br>paraneptunus-4 | Belize          | SAMN15732561           | 127272  |
| <i>ankeri</i>     | P2007-064-001_ CBC-paraneptunus-4       | Panama          | SAMN15732562           | 4031562 |
| <i>belizensis</i> | BR2008-070-003_ <i>belizensis</i>       | Barbados        | SAMN15732563           | 3181658 |
| <i>belizensis</i> | CU2008-049-002_ <i>belizensis</i>       | Curacao         | SAMN15732564           | 1437872 |
| <i>belizensis</i> | CU2008-094-001-sub1_ <i>belizensis</i>  | Curacao         | SAMN15732565           | 678916  |
| <i>belizensis</i> | CU2008-095-001-sub1_ <i>belizensis</i>  | Curacao         | SAMN15732566           | 5566818 |
| <i>bocas</i>      | JAM2008-005-003_ <i>bocas</i>           | Jamaica         | SAMN15732567           | 4786668 |
| <i>bocas</i>      | P2007-069-004-sub1_ <i>bocas</i>        | Panama          | SAMN15732568           | 641769  |
| <i>bocas</i>      | P2008-027-001_ <i>bocas</i>             | Panama          | SAMN15732569           | 415875  |
| <i>bocas</i>      | P2008-084-004_ <i>bocas</i>             | Panama          | SAMN15732570           | 1455179 |
| <i>bousfieldi</i> | CBC2005_037_006_002                     | Belize          | SAMN14351555           | 581693  |
| <i>bousfieldi</i> | CBC2005_037_006_003                     | Belize          | SAMN14351556           | 161390  |
| <i>bousfieldi</i> | CBC2009_024_001                         | Belize          | SAMN14351557           | 7703702 |
| <i>bousfieldi</i> | CBC2009_024_005                         | Belize          | SAMN14351558           | 3482204 |
| <i>bousfieldi</i> | CBC2009_036_003                         | Belize          | SAMN14351559           | 5104209 |
| <i>bousfieldi</i> | CBC2009_036_006                         | Belize          | SAMN14351560           | 3741335 |
| <i>bousfieldi</i> | CBC2009_066_003                         | Belize          | SAMN14351561           | 129954  |
| <i>bousfieldi</i> | CBC2009_088_002                         | Belize          | SAMN14351562           | 2460076 |
| <i>brevifrons</i> | CBC2004-045-001_ <i>brevifrons</i>      | Belize          | SAMN15732571           | 2067533 |
| <i>brevifrons</i> | CBC2004-045-002_ <i>brevifrons</i>      | Belize          | SAMN15732572           | 1501757 |
| <i>brooksi</i>    | CBC2005_002_008                         | Belize          | SAMN14351563           | 796502  |

|                     |                             |         |              |         |
|---------------------|-----------------------------|---------|--------------|---------|
| <i>brooksi</i>      | CBC2005_014_002             | Belize  | SAMN14351564 | 1251559 |
| <i>brooksi</i>      | CBC2005_031_006_001         | Belize  | SAMN14351565 | 1768197 |
| <i>brooksi</i>      | CBC2005_031_006_002         | Belize  | SAMN14351566 | 835656  |
| <i>brooksi</i>      | CBC2005_032_001             | Belize  | SAMN14351567 | 181648  |
| <i>brooksi</i>      | CBC2009_008_004             | Belize  | SAMN14351568 | 4729671 |
| <i>brooksi</i>      | CBC2009_040_002             | Belize  | SAMN14351569 | 5633593 |
| <i>brooksi</i>      | CBC2009_060_001             | Belize  | SAMN14351570 | 2196721 |
| <i>carpenteri</i>   | JAM2008-010-001_carpenteri  | Jamaica | SAMN14351571 | 2266519 |
| <i>carpenteri</i>   | JAM2008-013-001_carpenteri  | Jamaica | SAMN14351572 | 40926   |
| <i>carpenteri</i>   | JAM2008-020-006_carpenteri  | Jamaica | SAMN14351573 | 2181355 |
| <i>carpenteri</i>   | JAM2008-026-001_carpenteri  | Jamaica | SAMN14351574 | 2962781 |
| <i>carpenteri</i>   | JAM2008-030-004_carpenteri  | Jamaica | SAMN14351575 | 2892293 |
| <i>carpenteri</i>   | JAM2008-035-001_carpenteri  | Jamaica | SAMN14351576 | 3499187 |
| <i>carpenteri</i>   | JAM2008-038-001_carpenteri  | Jamaica | SAMN14351577 | 965799  |
| <i>carpenteri</i>   | JAM2008-039-001_carpenteri  | Jamaica | SAMN14351578 | 62802   |
| <i>cayoneptunus</i> | FK2013-041-001_cayoneptunus | USA     | SAMN15732573 | 10837   |
| <i>cayoneptunus</i> | FK2013-086-001_cayoneptunus | USA     | SAMN15732574 | 5915126 |
| <i>cayoneptunus</i> | FK2016-001-001_cayoneptunus | USA     | SAMN15732575 | 6492611 |
| <i>cayoneptunus</i> | FK2016-003-001_cayoneptunus | USA     | SAMN15732576 | 3529714 |
| <i>chacei</i>       | CBC2004-005-003_chacei      | Belize  | SAMN14351579 | 5163162 |
| <i>chacei</i>       | CBC2004-012-001_chacei      | Belize  | SAMN14351580 | 3973    |
| <i>chacei</i>       | CBC2004-042-004_chacei      | Belize  | SAMN14351581 | 1893724 |
| <i>chacei</i>       | CBC2004-044-001_chacei      | Belize  | SAMN14351582 | 2393097 |
| <i>chacei</i>       | CBC2004-056-001_chacei      | Belize  | SAMN14351583 | 2548842 |
| <i>chacei</i>       | CBC2004-060-002_chacei      | Belize  | SAMN14351584 | 3931458 |
| <i>chacei</i>       | CBC2004-061-002_chacei      | Belize  | SAMN14351585 | 64692   |
| <i>chacei</i>       | CBC2004-062-001_chacei      | Belize  | SAMN14351586 | 4844209 |
| <i>chacei</i>       | CBC2005-027-002_chacei      | Belize  | SAMN15732577 | 271315  |
| <i>chacei</i>       | CBC2009-019-012_chacei      | Belize  | SAMN15732578 | 24739   |
| <i>chacei</i>       | CBC2009-086-001_chacei      | Belize  | SAMN15732579 | 504352  |
| <i>chacei</i>       | P2008-019-004_chacei        | Panama  | SAMN15732580 | 7715128 |
| <i>chacei</i>       | P2008-020-003-sub2-4_chacei | Panama  | SAMN15732581 | 6644382 |
| <i>chacei</i>       | P2008-150-001_chacei        | Panama  | SAMN15732582 | 9215974 |
| <i>chacei</i>       | P2008-151-001_chacei        | Panama  | SAMN15732583 | 2760276 |
| <i>chacei</i>       | P2009-042-003_chacei        | Panama  | SAMN15732584 | 5151754 |
| <i>chacei</i>       | P2009-071-002_chacei        | Panama  | SAMN15732585 | 6398525 |
| <i>dardeau</i>      | CBC2005_002_014             | Belize  | SAMN14351587 | 380468  |
| <i>dardeau</i>      | CBC2005_014_017             | Belize  | SAMN14351588 | 57619   |
| <i>dardeau</i>      | CBC2005_030_003             | Belize  | SAMN14351589 | 1063406 |
| <i>dardeau</i>      | CBC2005_033_001             | Belize  | SAMN14351590 | 277469  |

|                    |                                  |         |              |         |
|--------------------|----------------------------------|---------|--------------|---------|
| <i>dardeaui</i>    | CBC2005_042_004                  | Belize  | SAMN14351591 | 19970   |
| <i>dardeaui</i>    | CBC2009_036_009                  | Belize  | SAMN14351592 | 1687798 |
| <i>dardeaui</i>    | CBC2009_039_001                  | Belize  | SAMN14351593 | 4010741 |
| <i>dardeaui</i>    | CBC2009_040_008                  | Belize  | SAMN14351594 | 2506752 |
| <i>duffy</i>       | FK16_1201_duffy                  | USA     | SAMN15732540 | 6336    |
| <i>duffy</i>       | FK16_1202_duffy                  | USA     | SAMN15732541 | 7634625 |
| <i>duffy</i>       | FK16_1203_duffy                  | USA     | SAMN15732542 | 5857758 |
| <i>duffy</i>       | FK16_1204_duffy                  | USA     | SAMN15732543 | 4777737 |
| <i>duffy</i>       | FK16_1205_duffy                  | USA     | SAMN15732544 | 4866481 |
| <i>duffy</i>       | FK16_1206_duffy                  | USA     | SAMN15732545 | 7488702 |
| <i>duffy</i>       | FK16_1207_duffy                  | USA     | SAMN15732546 | 4855903 |
| <i>duffy</i>       | FK16_1208_duffy                  | USA     | SAMN15732547 | 8319401 |
| <i>duffy</i>       | JAM2008-009-001_duffy            | Jamaica | SAMN14351595 | 1649957 |
| <i>duffy</i>       | JAM2008-012-003_duffy            | Jamaica | SAMN15732586 | 131538  |
| <i>duffy</i>       | JAM2008-012-004_duffy            | Jamaica | SAMN14351596 | 688617  |
| <i>duffy</i>       | JAM2008-050-001_duffy            | Jamaica | SAMN14351597 | 4636965 |
| <i>duffy</i>       | JAM2008-075-008_duffy            | Jamaica | SAMN14351598 | 2814775 |
| <i>duffy</i>       | JAM2012-033-030_duffy            | Jamaica | SAMN15732587 | 1171708 |
| <i>duffy</i>       | JAM2012-070-007_duffy            | Jamaica | SAMN15732588 | 389474  |
| <i>duffy</i>       | JAM2012-135-003_duffy            | Jamaica | SAMN14351599 | 2337575 |
| <i>duffy</i>       | JAM2012-165-001_duffy            | Jamaica | SAMN14351600 | 3006494 |
| <i>elizabethae</i> | P2007_065_005                    | Panama  | SAMN15732526 | 7982335 |
| <i>elizabethae</i> | P2008_018_016                    | Panama  | SAMN15732527 | 3710578 |
| <i>elizabethae</i> | P2008_024_001                    | Panama  | SAMN15732528 | 2008742 |
| <i>elizabethae</i> | P2008_091_036                    | Panama  | SAMN15732529 | 35934   |
| <i>elizabethae</i> | P2008_143_004                    | Panama  | SAMN15732530 | 5949    |
| <i>elizabethae</i> | P2009_032_001                    | Panama  | SAMN15732531 | 1711790 |
| <i>elizabethae</i> | P2009_046_015                    | Panama  | SAMN15732532 | 5242412 |
| <i>elizabethae</i> | P2009_066_001                    | Panama  | SAMN15732533 | 3541134 |
| <i>filidigitus</i> | CBC2005_007_002_filidigitus      | Belize  | SAMN12568980 | 108622  |
| <i>filidigitus</i> | CBC2005_007_003                  | Belize  | SAMN15732534 | 72852   |
| <i>filidigitus</i> | CBC2005_007_003_filidigitus      | Belize  | SAMN15732589 | 22735   |
| <i>filidigitus</i> | CBC2005_025_001_sub1             | Belize  | SAMN15732535 | 3808    |
| <i>filidigitus</i> | CBC2005_025_001_sub1_filidigitus | Belize  | SAMN15732590 | 120153  |
| <i>filidigitus</i> | CBC2005_025_001_sub2_filidigitus | Belize  | SAMN15732591 | 138515  |
| <i>filidigitus</i> | CBC2005_026_002_filidigitus      | Belize  | SAMN15732592 | 73788   |
| <i>filidigitus</i> | CBC2005_026_003_sub1_filidigitus | Belize  | SAMN15732593 | 26019   |
| <i>filidigitus</i> | CBC2009_042_003                  | Belize  | SAMN15732536 | 83584   |
| <i>filidigitus</i> | CBC2009_076_004_001_001          | Belize  | SAMN15732537 | 2344998 |
| <i>filidigitus</i> | CBC2009_077_002                  | Belize  | SAMN15732538 | 90729   |

|                           |                                       |          |              |         |
|---------------------------|---------------------------------------|----------|--------------|---------|
| <i>filidigitus</i>        | CBC2009_077_002_filidigitus           | Belize   | SAMN12568980 | 1180030 |
| <i>filidigitus</i>        | CBC2009_077_003_004_001               | Belize   | SAMN15732539 | 1810436 |
| <i>filidigitus</i>        | CBC2009_077_003_sub004002_filidigitus | Belize   | SAMN15732594 | 941409  |
| <i>goodei</i>             | P2007-036-006-sub1_goodei             | Panama   | SAMN15732595 | 3020972 |
| <i>goodei</i>             | P2008-087-001-sub1-1_goodei           | Panama   | SAMN15732596 | 3658409 |
| <i>herricki</i>           | CU08_2703_01_herricki                 | Curacao  | SAMN15732548 | 96951   |
| <i>herricki</i>           | CU08_2703_02_herricki                 | Curacao  | SAMN15732549 | 1298174 |
| <i>herricki</i>           | CU08_2703_03_herricki                 | Curacao  | SAMN15732550 | 1499343 |
| <i>herricki</i>           | CU08_2703_04_herricki                 | Curacao  | SAMN15732551 | 12453   |
| <i>herricki</i>           | CU08_2703_05_herricki                 | Curacao  | SAMN15732552 | 1151336 |
| <i>herricki</i>           | CU08_2704_herricki                    | Curacao  | SAMN15732553 | 5152095 |
| <i>herricki</i>           | CU08_2705_herricki                    | Curacao  | SAMN15732554 | 755819  |
| <i>herricki</i>           | CU08_2706_herricki                    | Curacao  | SAMN15732555 | 1466840 |
| <i>hoetjesi</i>           | BR2008-067-001_hoetjesi               | Barbados | SAMN15732597 | 4528268 |
| <i>hoetjesi</i>           | CU2008-003-003_hoetjesi               | Curacao  | SAMN12568981 | 5033305 |
| <i>hoetjesi</i>           | CU2008-041-002_hoetjesi               | Curacao  | SAMN15732598 | 752181  |
| <i>hoetjesi</i>           | CU2008-089-004_hoetjesi               | Curacao  | SAMN15732599 | 3456355 |
| <i>ideos</i>              | BR08_101_01_idios                     | Barbados | SAMN14351610 | 5557430 |
| <i>ideos</i>              | BR08_101_03_idios                     | Barbados | SAMN14351611 | 383046  |
| <i>ideos</i>              | BR08_101_04_idios                     | Barbados | SAMN14351612 | 2277043 |
| <i>ideos</i>              | BR08_104_02_idios                     | Barbados | SAMN14351613 | 2168882 |
| <i>ideos</i>              | BR08_105_02_idios                     | Barbados | SAMN14351614 | 3132976 |
| <i>ideos</i>              | BR08_105_03_idios                     | Barbados | SAMN14351615 | 6297978 |
| <i>ideos</i>              | BR08_105_04_idios                     | Barbados | SAMN14351616 | 7276883 |
| <i>ideos</i>              | BR08_105_05_idios                     | Barbados | SAMN14351617 | 6879533 |
| <i>kensleyi</i>           | CBC2012-023-001_kensleyi              | Belize   | SAMN12568984 | 7414069 |
| <i>kensleyi</i>           | CBC2012-040-001_kensleyi              | Belize   | SAMN15732600 | 3222    |
| <i>kensleyi</i>           | CBC2012-211-002_kensleyi              | Belize   | SAMN15732601 | 77547   |
| <i>kensleyi</i>           | P2003-020-001_kensleyi                | Panama   | SAMN15732602 | 220931  |
| <i>longicarpus</i>        | FK2005-001-001_longicarpus            | USA      | SAMN15732603 | 419893  |
| <i>longicarpus</i>        | FK2005-001-002_longicarpus            | USA      | SAMN15732604 | 246975  |
| <i>longicarpus</i>        | P1993-035-009_longicarpus             | Panama   | SAMN15732605 | 4330775 |
| <i>longicarpus</i>        | P1993-035-010_longicarpus             | Panama   | SAMN15732606 | 177422  |
| <i>longicarpus_sm all</i> | P2007_012_001                         | Panama   | SAMN14351618 | 8182806 |
| <i>longicarpus_sm all</i> | P2007_032_003                         | Panama   | SAMN14351619 | 2254342 |
| <i>longicarpus_sm all</i> | P2007_053_001                         | Panama   | SAMN14351620 | 4152873 |
| <i>longicarpus_sm all</i> | P2007_071_001                         | Panama   | SAMN14351621 | 4036431 |

|                           |                                 |          |              |          |
|---------------------------|---------------------------------|----------|--------------|----------|
| <i>longicarpus_sm all</i> | P2008_080_001                   | Panama   | SAMN14351622 | 6369320  |
| <i>longicarpus_sm all</i> | P2008_134_002                   | Panama   | SAMN14351623 | 3060848  |
| <i>longicarpus_sm all</i> | P2009_039_002                   | Panama   | SAMN14351624 | 3727     |
| <i>longicarpus_sm all</i> | P2009_092_002                   | Panama   | SAMN14351625 | 4341842  |
| <i>microneptunus</i>      | BR2008-020-001_microneptunus    | Barbados | SAMN12568982 | 5439396  |
| <i>microneptunus</i>      | BR2008-036-002_microneptunus    | Barbados | SAMN15732607 | 3017078  |
| <i>microneptunus</i>      | BR2008-041-003_microneptunus    | Barbados | SAMN15732608 | 176498   |
| <i>microneptunus</i>      | BR2008-052-001_microneptunus    | Barbados | SAMN15732609 | 2614173  |
| <i>pandionis</i>          | BR2008-027-006_pandionis        | Barbados | SAMN15732610 | 573484   |
| <i>pandionis</i>          | BR2008-086-002_pandionis        | Barbados | SAMN15732611 | 963831   |
| <i>pandionis</i>          | JAM2008-059-004_pandionis       | Jamaica  | SAMN15732612 | 1502827  |
| <i>pandionis</i>          | JAM2008-090-001_pandionis       | Jamaica  | SAMN12568983 | 8141783  |
| <i>pectiniger</i>         | FK2005-005-003_pectiniger       | USA      | SAMN15732613 | 781151   |
| <i>pectiniger</i>         | FK2005-011-011-sub02_pectiniger | USA      | SAMN15732614 | 124191   |
| <i>pectiniger</i>         | FK2005-016-001-sub2_pectiniger  | USA      | SAMN15732615 | 2765726  |
| <i>pectiniger</i>         | FK2005-019-012_pectiniger       | USA      | SAMN15732616 | 14338    |
| <i>rathbunae</i>          | P08_129_03_1                    | Panama   | SAMN14351626 | 8687218  |
| <i>rathbunae</i>          | P2007_039_001_018               | Panama   | SAMN14351627 | 1150165  |
| <i>rathbunae</i>          | P2007_039_002_002               | Panama   | SAMN14351628 | 11190498 |
| <i>rathbunae</i>          | P2008_117_003                   | Panama   | SAMN14351630 | 299551   |
| <i>rathbunae</i>          | P2008_129_003_002               | Panama   | SAMN14351631 | 5318453  |
| <i>rathbunae</i>          | P2008_131_004                   | Panama   | SAMN14351633 | 5274951  |
| <i>regalis</i>            | JAM2008-033-003_regalis         | Jamaica  | SAMN15732617 | 11004163 |
| <i>regalis</i>            | JAM2008-060-001_regalis         | Jamaica  | SAMN15732618 | 8229780  |
| <i>regalis</i>            | JAM2008-062-001_regalis         | Jamaica  | SAMN15732619 | 4914491  |
| <i>regalis</i>            | JAM2008-063-001_regalis         | Jamaica  | SAMN12568985 | 3810169  |
| <i>regalis</i>            | JAM2008-064-001_regalis         | Jamaica  | SAMN15732620 | 3824614  |
| <i>regalis</i>            | JAM2008-086-001_regalis         | Jamaica  | SAMN15732621 | 6855185  |
| <i>regalis</i>            | JAM2008-091-001_regalis         | Jamaica  | SAMN15732622 | 5996348  |
| <i>regalis</i>            | JAM2008-094-001_regalis         | Jamaica  | SAMN15732623 | 13726    |
| <i>ruetzleri</i>          | P2003-010-001_ruetzleri         | Panama   | SAMN15732624 | 836722   |
| <i>ruetzleri</i>          | P2003-010-002_ruetzleri         | Panama   | SAMN15732625 | 574117   |
| <i>ruetzleri</i>          | P2003-012-004_ruetzleri         | Panama   | SAMN15732626 | 1718116  |
| <i>ruetzleri</i>          | P2003-023-001_ruetzleri         | Panama   | SAMN15732627 | 247891   |
| <i>sanctithomae</i>       | CU2008-062-001_sanctithomae     | Curacao  | SAMN15732628 | 717078   |
| <i>sanctithomae</i>       | JAM2008-001-001_sanctithomae    | Jamaica  | SAMN15732629 | 2471139  |
| <i>sanctithomae</i>       | JAM2008-007-004_sanctithomae    | Jamaica  | SAMN15732630 | 1583293  |
| <i>sanctithomae</i>       | JAM2008-019-001_sanctithomae    | Jamaica  | SAMN15732631 | 144517   |

|                  |                             |          |              |          |
|------------------|-----------------------------|----------|--------------|----------|
| <i>thele</i>     | JAM2008-041-005_thele       | Jamaica  | SAMN15732632 | 5195054  |
| <i>thele</i>     | JAM2008-061-008_thele       | Jamaica  | SAMN15732633 | 722428   |
| <i>thele</i>     | JAM2008-078-001_thele       | Jamaica  | SAMN15732634 | 2096740  |
| <i>thele</i>     | JAM2008-089-001-sub02_thele | Jamaica  | SAMN15732635 | 1205     |
| <i>ul</i>        | BR2008-027-002-sub2_ul      | Barbados | SAMN15732636 | 2621598  |
| <i>ul</i>        | BR2008-087-003_ul           | Barbados | SAMN15732637 | 79792    |
| <i>ul</i>        | BR2008-099-001_ul           | Barbados | SAMN15732638 | 128934   |
| <i>ul</i>        | BR2008-101-001_ul           | Barbados | SAMN15732639 | 189312   |
| <i>williamsi</i> | CU2008-024-001_williamsi    | Curacao  | SAMN15732640 | 2256296  |
| <i>williamsi</i> | CU2008-036-001_williamsi    | Curacao  | SAMN15732641 | 1410176  |
| <i>williamsi</i> | CU2008-046-002_williamsi    | Curacao  | SAMN15732642 | 5469948  |
| <i>williamsi</i> | CU2008-053-001_williamsi    | Curacao  | SAMN15732643 | 9789356  |
| <i>yano</i>      | BDT2011_209_004_002         | Panama   | SAMN14351634 | 4326791  |
| <i>yano</i>      | P2007_013_003               | Panama   | SAMN14351635 | 14853546 |
| <i>yano</i>      | P2007_035_003               | Panama   | SAMN14351636 | 5689999  |
| <i>yano</i>      | P2007_060_003               | Panama   | SAMN14351637 | 5059732  |
| <i>yano</i>      | P2008_003_011               | Panama   | SAMN14351638 | 5117767  |
| <i>yano</i>      | P2008_017_002               | Panama   | SAMN14351639 | 2933595  |
| <i>yano</i>      | P2008_090_011               | Panama   | SAMN14351640 | 3685977  |
| <i>yano</i>      | P2009_020_001               | Panama   | SAMN14351641 | 542041   |

---

**Table S2. Results of Bayesian phylogenetic mixed model analyses.** Models predicted the proportions of transposable elements (TE) by sociality, controlling for the effect egg size. Egg size was quantified as egg volume, and body size as carapace length. Values of delta DIC were calculated by comparing two models with or without the factor sociality (pair-living, communal breeding, and eusociality). Significant effects are indicated by bold and asterisks.

| Response              | Predictor         | Delta DIC | Parameter                      | Posterior mean | pMCMC              |
|-----------------------|-------------------|-----------|--------------------------------|----------------|--------------------|
| Genome size           | Sociality         | -6.48     | Eusocial - communal            | 0.106          | 0.154              |
|                       |                   |           | <b>Eusocial - pair</b>         | <b>0.163</b>   | <b>0.009</b> *     |
|                       |                   |           | Communal - pair                | 0.057          | 0.257              |
|                       |                   |           | <b>Eusocial - non-eusocial</b> | <b>0.135</b>   | <b>0.033</b> *     |
|                       |                   |           | <b>slope</b>                   | <b>0.267</b>   | <b>0.001</b> *     |
|                       | Egg size          |           | slope                          | 0.055          | 0.581              |
|                       | Body size         |           | slope                          |                |                    |
| Genome size           | Eusociality index | 2.74      | <b>slope</b>                   | <b>0.249</b>   | <b>0.002</b> *     |
|                       |                   |           | <b>slope</b>                   | <b>0.277</b>   | <b>&lt;0.001</b> * |
|                       |                   |           | slope                          | 0.040          | 0.628              |
| All TEs               | Sociality         | 9.6       | <b>Eusocial - Communal</b>     | <b>0.130</b>   | <b>0.001</b> *     |
|                       |                   |           | <b>Eusocial - Pair</b>         | <b>0.560</b>   | <b>0.001</b> *     |
|                       |                   |           | <b>Communal - Pair</b>         | <b>0.430</b>   | <b>0.010</b> *     |
|                       |                   |           | <b>Eusocial - Non-eusocial</b> | <b>0.345</b>   | <b>0.034</b> *     |
|                       |                   |           | Slope                          | 0.399          | 0.091              |
|                       | Egg size          |           | Slope                          |                |                    |
| All TEs               | Eusociality index |           | <b>Slope</b>                   | <b>0.759</b>   | <b>0.006</b> *     |
|                       |                   |           | <b>Slope</b>                   | <b>0.474</b>   | <b>0.077</b> *     |
| DNA transposons       | Sociality         | -1.51     | Eusocial - Communal            | -0.168         | 0.062              |
|                       |                   |           | Eusocial - Pair                | 0.390          | 0.062              |
|                       |                   |           | <b>Communal - Pair</b>         | <b>0.558</b>   | <b>0.008</b> *     |
|                       |                   |           | Eusocial - Non-eusocial        | 0.111          | 0.583              |
|                       |                   |           | Slope                          | -0.156         | 0.597              |
|                       | Egg size          |           | Slope                          |                |                    |
| DNA transposons       | Eusociality index |           | Slope                          | 0.487          | 0.146              |
|                       |                   |           | Slope                          | -0.008         | 0.989              |
| LINEs                 | Sociality         | -0.66     | Eusocial - Communal            | 0.022          | 0.156              |
|                       |                   |           | Eusocial - Pair                | 0.335          | 0.156              |
|                       |                   |           | Communal - Pair                | 0.314          | 0.192              |
|                       |                   |           | Eusocial - Non-eusocial        | 0.178          | 0.440              |
|                       |                   |           | Slope                          | 0.222          | 0.515              |
|                       | Egg size          |           | Slope                          |                |                    |
| LINEs                 | Eusociality index |           | Slope                          | 0.341          | 0.343              |
|                       |                   |           | Slope                          | 0.247          | 0.500              |
| LTR retro-transposons | Sociality         | 5.43      | <b>Eusocial - Communal</b>     | <b>0.106</b>   | <b>0.006</b> *     |
|                       |                   |           | <b>Eusocial - Pair</b>         | <b>0.487</b>   | <b>0.006</b> *     |
|                       |                   |           | <b>Communal - Pair</b>         | <b>0.381</b>   | <b>0.028</b> *     |
|                       |                   |           | Eusocial - Non-eusocial        | 0.297          | 0.073              |
|                       |                   |           | <b>Slope</b>                   | <b>0.578</b>   | <b>0.025</b> *     |
|                       | Egg size          |           | Slope                          |                |                    |
| LTR retro-transposons | Eusociality index |           | <b>Slope</b>                   | <b>0.725</b>   | <b>0.012</b> *     |
|                       |                   |           | <b>Slope</b>                   | <b>0.637</b>   | <b>0.027</b> *     |
| RC                    | Sociality         | -30.85    | Eusocial - Communal            | 0.128          | 0.140              |
|                       |                   |           | Eusocial - Pair                | 0.434          | 0.140              |
|                       |                   |           | Communal - Pair                | 0.306          | 0.259              |
|                       |                   |           | Eusocial - Non-eusocial        | 0.281          | 0.296              |
|                       |                   |           | Slope                          | 0.199          | 0.623              |
|                       | Egg size          |           | Slope                          |                |                    |
| RC                    | Eusociality index |           | Slope                          | 0.408          | 0.370              |
|                       |                   |           | Slope                          | 0.209          | 0.632              |
| SINE                  | Sociality         | -4.48     | Eusocial - Communal            | 0.000          | 0.985              |
|                       |                   |           | Eusocial - Pair                | 0.000          | 0.985              |
|                       |                   |           | Communal - Pair                | 0.000          | 0.993              |
|                       |                   |           | Eusocial - Non-eusocial        | 0.000          | 0.979              |
|                       |                   |           | Slope                          | 0.000          | 0.981              |
|                       | Egg size          |           | Slope                          |                |                    |
| SINE                  | Eusociality index |           | Slope                          | 0.000          | 0.997              |
|                       |                   |           | Slope                          | 0.000          | 0.983              |
| Unknown TE subclass   | Sociality         | 3.74      | <b>Eusocial - Communal</b>     | <b>0.344</b>   | <b>0.011</b> *     |
|                       |                   |           | <b>Eusocial - Pair</b>         | <b>0.540</b>   | <b>0.011</b> *     |
|                       |                   |           | Communal - Pair                | 0.196          | 0.327              |
|                       |                   |           | <b>Eusocial - Non-eusocial</b> | <b>0.442</b>   | <b>0.029</b> *     |
|                       |                   |           | <b>Slope</b>                   | <b>0.475</b>   | <b>0.100</b>       |
|                       | Egg size          |           | Slope                          |                |                    |
| Unknown TE subclass   | Eusociality index |           | <b>Slope</b>                   | <b>0.673</b>   | <b>0.033</b> *     |
|                       |                   |           | Slope                          | 0.525          | 0.087              |
| Microsatellites       | Sociality         | 1.97      | Eusocial - Communal            | 0.177          | 0.141              |



|                 |                   |                                |              |              |   |
|-----------------|-------------------|--------------------------------|--------------|--------------|---|
|                 |                   | <b>Eusocial - Pair</b>         | <b>0.254</b> | <b>0.011</b> | * |
|                 |                   | Communal - Pair                | 0.077        | 0.410        |   |
|                 |                   | <b>Eusocial - Non-eusocial</b> | <b>0.216</b> | <b>0.036</b> | * |
|                 | Egg size          | Slope                          | 0.209        | 0.152        |   |
| Microsatellites | Eusociality index | <b>Slope</b>                   | <b>0.299</b> | <b>0.043</b> | * |
|                 | Egg size          | Slope                          | 0.198        | 0.168        |   |
| Genome size     | all TEs           | <b>Slope</b>                   | <b>0.120</b> | <b>0.004</b> | * |
|                 | Egg size          | <b>Slope</b>                   | <b>0.239</b> | <b>0.001</b> | * |
| Genome size     | Microsatellites   | Slope                          | 0.133        | 0.099        |   |
|                 | <b>Egg size</b>   | <b>Slope</b>                   | <b>0.237</b> | <b>0.004</b> | * |

**Table S3. Path coefficients from competing path models.** We modeled social organization either categorically as eusocial vs. non-eusocial species (pair-living and communal breeding combined) or continuously as the eusociality index. CI: confidence interval, SOC: social organization, GS: genome size, TE: transposable element abundance. Significant paths are indicated by bold and asterisks.

| <b>Social organization</b> | <b>Model</b> | <b>Path</b>         | <b>Path coefficient</b> | <b>Lower 95% CI</b> | <b>Upper 95% CI</b> |
|----------------------------|--------------|---------------------|-------------------------|---------------------|---------------------|
| Eusocial vs. non-eusocial  | 1            | SOC -> TE           | 0.67                    | -0.084              | 1.395               |
|                            |              | <b>TE -&gt; GS</b>  | <b>0.36</b>             | <b>0.090</b>        | <b>0.624</b> *      |
|                            | 2            | TE -> SOC           | 0.54                    | -0.149              | 1.685               |
|                            |              | <b>TE -&gt; GS</b>  | <b>0.36</b>             | <b>0.094</b>        | <b>0.632</b> *      |
|                            | 3            | SOC -> GS           | 0.60                    | -0.212              | 1.422               |
|                            |              | <b>GS -&gt; TE</b>  | <b>0.45</b>             | <b>0.050</b>        | <b>0.879</b> *      |
|                            | 4            | SOC -> TE           | 0.67                    | -0.041              | 1.400               |
|                            |              | SOC -> GS           | 0.60                    | -0.185              | 1.372               |
|                            | 5            | <b>TE -&gt; GS</b>  | <b>0.34</b>             | <b>0.053</b>        | <b>0.636</b> *      |
|                            |              | SOC -> GS           | 0.21                    | -0.583              | 1.030               |
| Eusociality index          | 1            | <b>SOC -&gt; TE</b> | <b>0.45</b>             | <b>0.121</b>        | <b>0.811</b> *      |
|                            |              | <b>TE -&gt; GS</b>  | <b>0.36</b>             | <b>0.095</b>        | <b>0.629</b> *      |
|                            | 2            | <b>TE -&gt; SOC</b> | <b>0.36</b>             | <b>0.088</b>        | <b>0.650</b> *      |
|                            |              | <b>TE -&gt; GS</b>  | <b>0.36</b>             | <b>0.089</b>        | <b>0.617</b> *      |
|                            | 3            | <b>SOC -&gt; GS</b> | <b>0.39</b>             | <b>0.051</b>        | <b>0.709</b> *      |
|                            |              | <b>GS -&gt; TE</b>  | <b>0.45</b>             | <b>0.031</b>        | <b>0.862</b> *      |
|                            | 4            | <b>SOC -&gt; TE</b> | <b>0.45</b>             | <b>0.098</b>        | <b>0.799</b> *      |
|                            |              | <b>SOC -&gt; GS</b> | <b>0.39</b>             | <b>0.050</b>        | <b>0.735</b> *      |
|                            | 5            | TE -> GS            | 0.28                    | -0.022              | 0.571               |
|                            |              | SOC-> GS            | 0.22                    | -0.138              | 0.593               |

**Table S4. Path coefficients from permutation data.** CI: confidence intervals based on 5,000 permutations.

|                           |          | <b>Observed path coefficient</b> | <b>Lower 95% CI</b> | <b>Upper 95% CI</b> |
|---------------------------|----------|----------------------------------|---------------------|---------------------|
| Eusociality index         | E -> TE  | 0.452                            | -0.309              | 0.312 *             |
|                           | TE -> E  | 0.364                            | -0.129              | 0.135 *             |
|                           | TE -> GS | 0.362                            | -0.339              | 0.348 *             |
| Eusocial vs. non-eusocial | E -> TE  | 0.892                            | -0.659              | 0.647 *             |
|                           | TE -> E  | 0.709                            | -0.290              | 0.278 *             |
|                           | TE -> GS | 0.373                            | -0.598              | 0.540               |

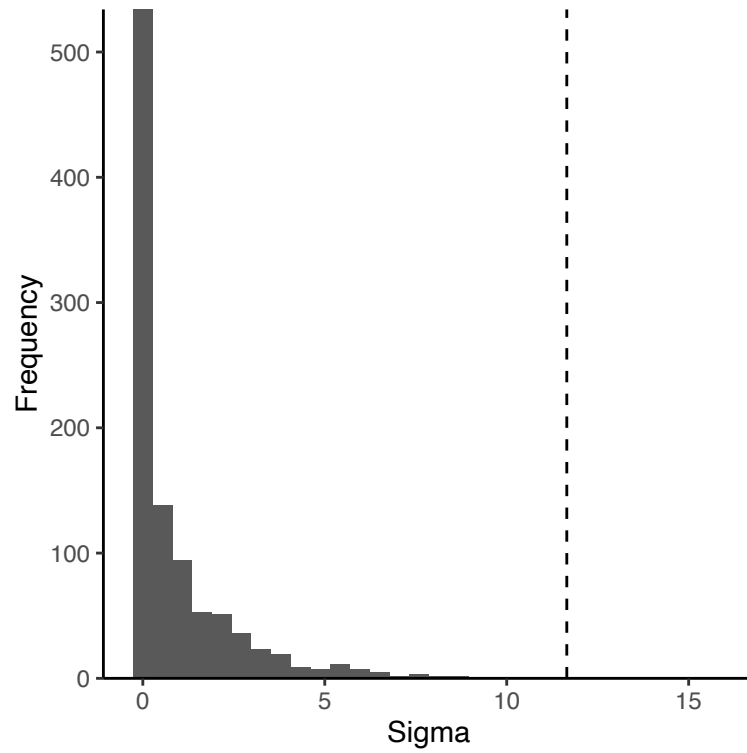

**Fig. S1. Distribution of the log-likelihood ratio ( $\sigma = -2(\ln L_{\text{BM}} - \ln L_{\text{OU}})$ ) between the Brownian motion (BM) and Ornstein-Uhlenbeck (OU) models based on 1,000 simulated datasets. The horizontal dashed line indicates the value from the observed data.**

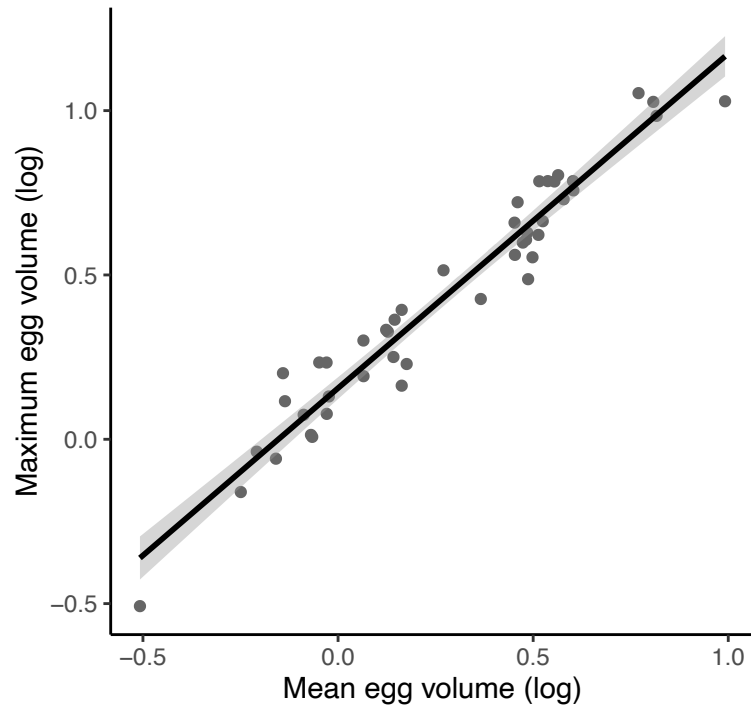

**Fig. S2. Linear regression between mean and maximum egg volume (N = 49).** Although egg volume can change with developmental stage, mean and maximum egg volumes were strongly correlated. Grey dots: raw data, black line: linear regression line, grey shadow: standard error of the linear regression.

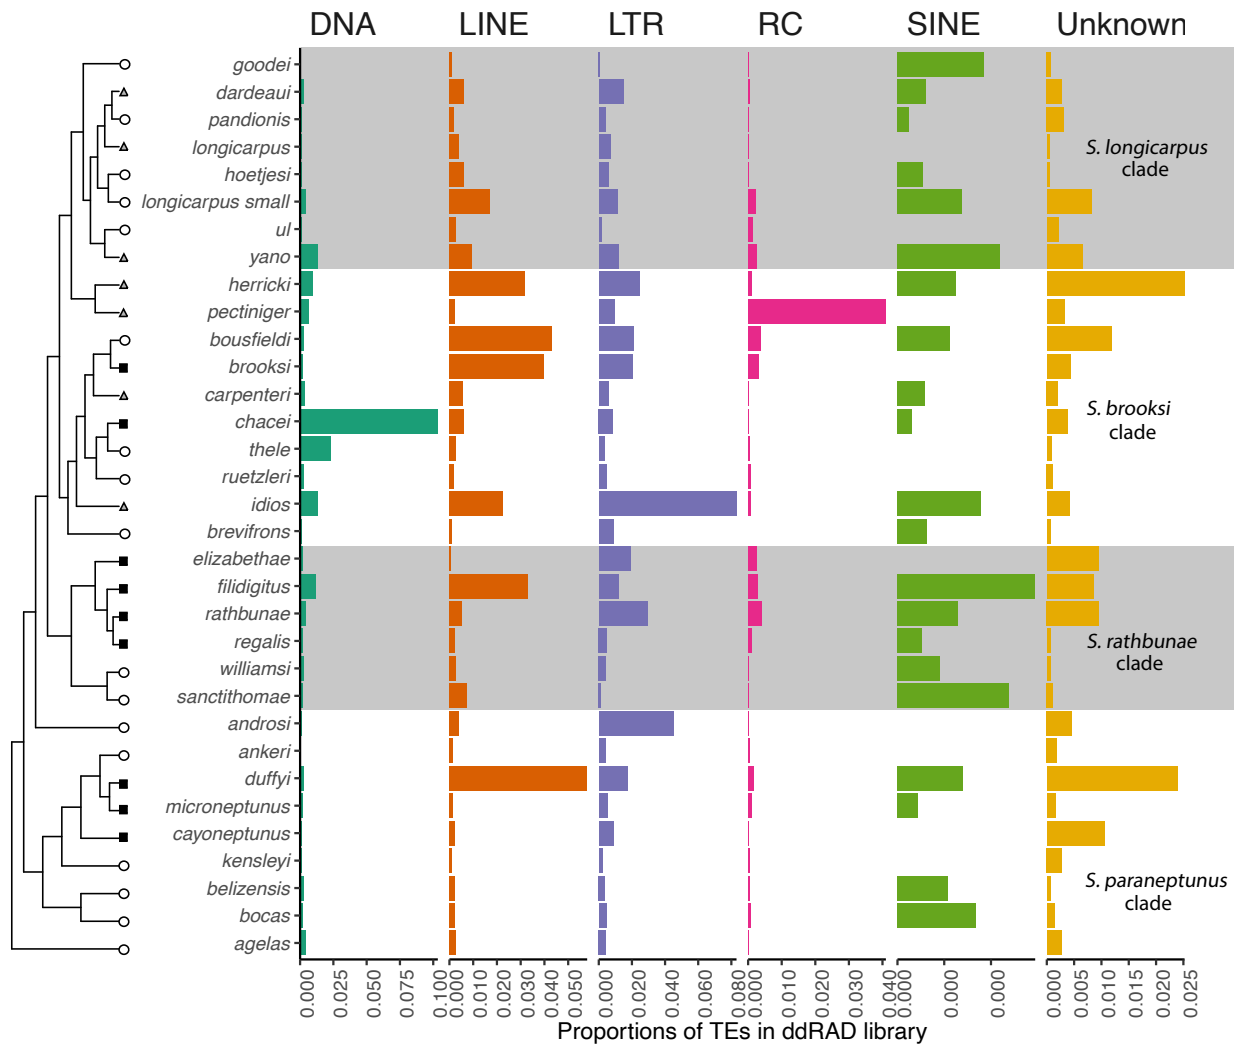

**Fig. S3. Phylogenetic distribution of the proportions of transposable element (TE)**

**subclasses in *Synalpheus* (N = 33).** The x-axes are at different scales for each TE subclass to

better depict the interspecific difference with each TE subclass. TE subclasses include DNA

transposons (DNA), long-terminal repeats (LTR) retrotransposons, long interspersed nuclear

elements (LINE), rolling-circle transposons (RC), short interspersed nuclear elements (SINE),

and TEs with unknown subclass. Eusocial species (closed squares) tended to have more TEs than

pair-living species (open circles) and communal breeding species (open triangles). The increase

in the proportion of total TEs is influenced by different TE subclasses in different species. The phylogenetic tree (based on Chak, Duffy, Hultgren and Rubenstein (1)) on the left depicts the relationships among species. Colors in the bar graphs represent major TE subclasses that are defined in the insert. The grey boxes separate the four major *Synalpheus* clades, those with pair-living and eusocial species (the *paraneptunus* and *rathbunae* clades), with pair-living and communal breeding species (*longicarpus* clade), and with pair-living, communal breeding, and eusocial species (*brooksi* clade).

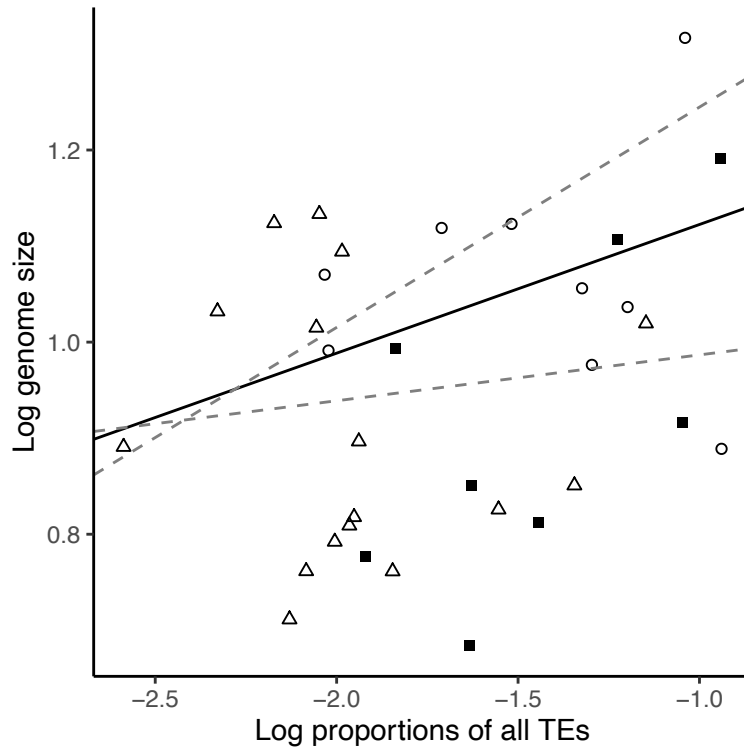

**Fig. S4. Linear relationship between the proportions of transposable elements (TE) and genome size on a log scale (N = 33).** Raw values are shown in shapes (open circle: pair-living; open triangle: communal breeding; closed square: eusocial). Posterior means and 95% credibility intervals of the regression line based on phylogenetic mixed models are shown as solid and dashed lines, respectively (pMCMC = 0.004), after controlling for the effect of egg size.



## Reference

1. S. T. C. Chak, J. E. Duffy, K. M. Hultgren, D. R. Rubenstein, Evolutionary transitions towards eusociality in snapping shrimps. *Nature Ecology & Evolution* **1**, 0096 (2017).
